# Supplementary material for: Restoration of the molecular clock is tumor suppressive in neuroblastoma
Source: PubMed Central journal article supplement (PMC8238982; doi:10.1038/s41467-021-24196-4), 2021-06-28
Supplement: 41467_2021_24196_MOESM1_ESM.pdf [file 41467_2021_24196_MOESM1_ESM.pdf]

**a** 88 NB Samples (GSE16476)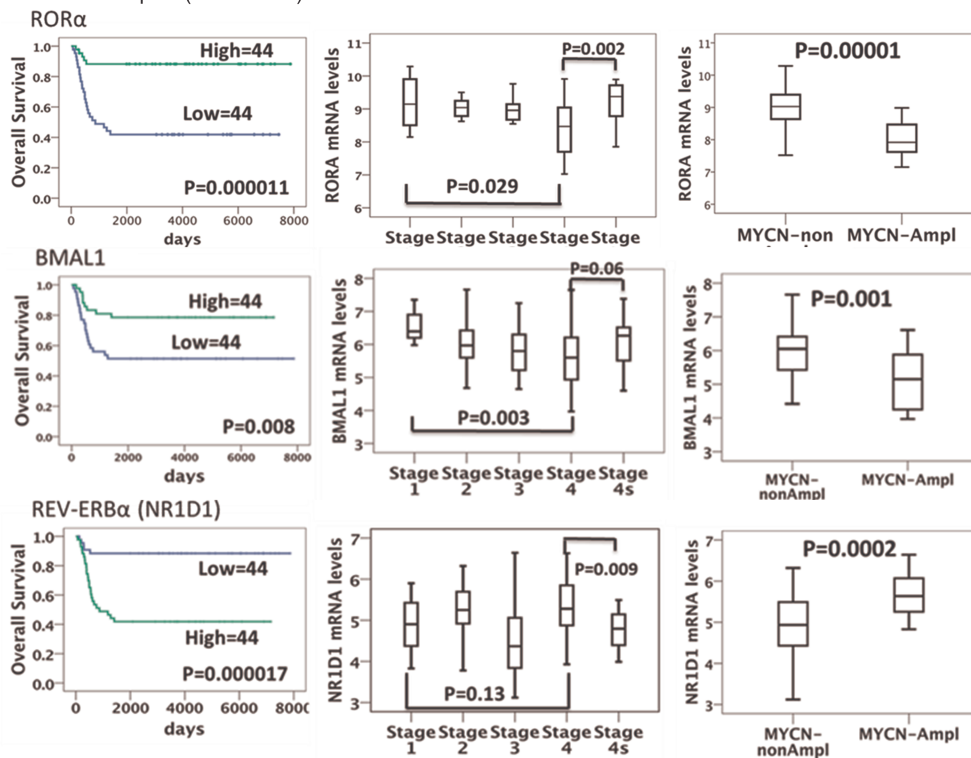**b** 219 NB Stage 3 and 4 Samples (GSE45547)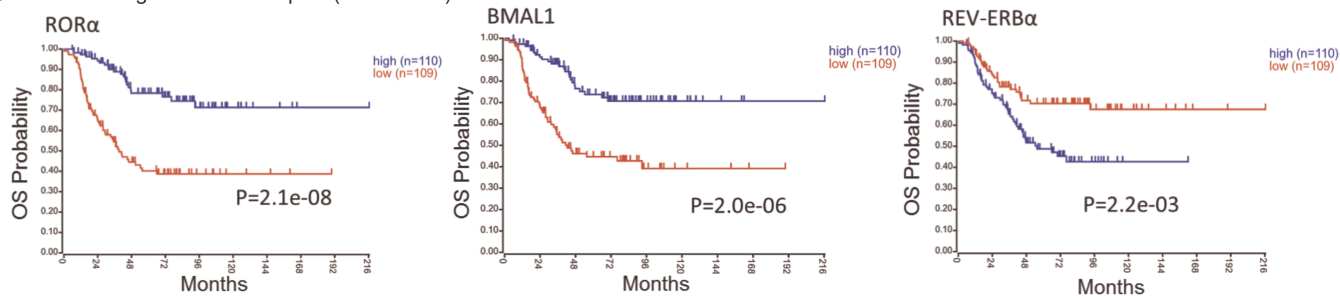**c** RORα mRNA levels (283 samples; GSE85047)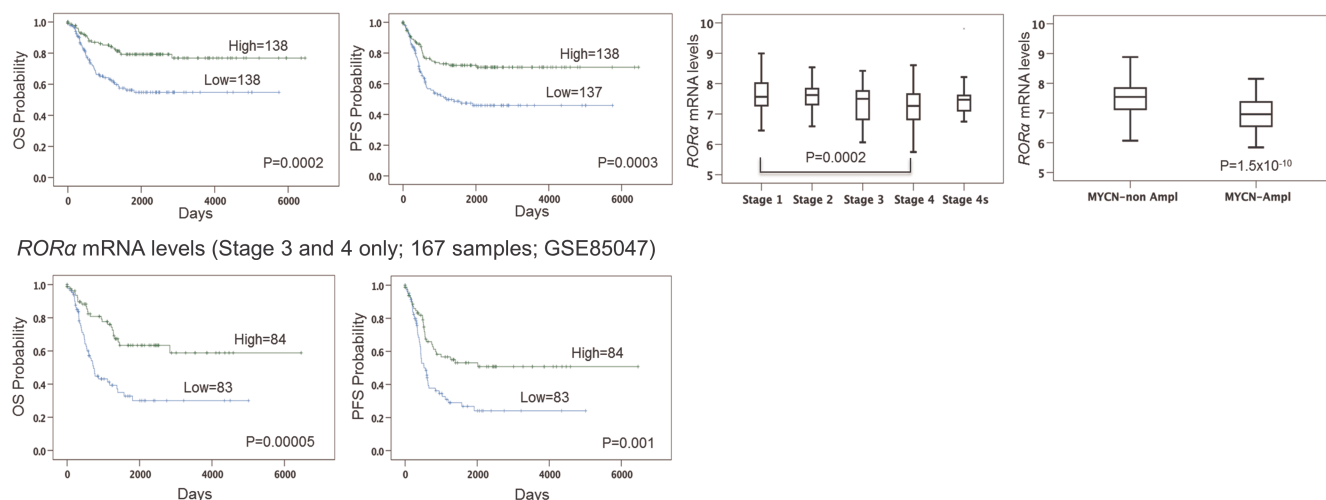

**Supplementary Figure 1. Clock gene expression correlates with poor clinical outcome. a.** Kaplan-Meier analysis of OS in patient cohort 2 ( $n=88$ , GEO: [GSE16476](#)). Graphs depict p-values corrected for multiple testing (Bonferroni correction) of cutoff levels for *RORα*, *BMAL1*, and *REV-ERBα*. Correlation between mRNA expression, INSS stages, and MYCN amplification is shown. **b.** Kaplan-Meier analysis of OS restricted to stage 3 and 4 in cohort 1 (GEO: [GSE45547](#)). **c.** Kaplan-Meier analysis of OS and PFS in patient cohort 3 ( $n=283$ , GEO: [GSE85047](#)) based on *RORα* mRNA expression in all patients vs. stage 3 and 4 patients only. Correlations with INSS stages and MYCN amplification are also shown. For 1a and 1c: The box plot is defined by two lines at the 25<sup>th</sup> percentile and 75<sup>th</sup> percentile. A line is drawn inside the box at the 50<sup>th</sup> percentile.

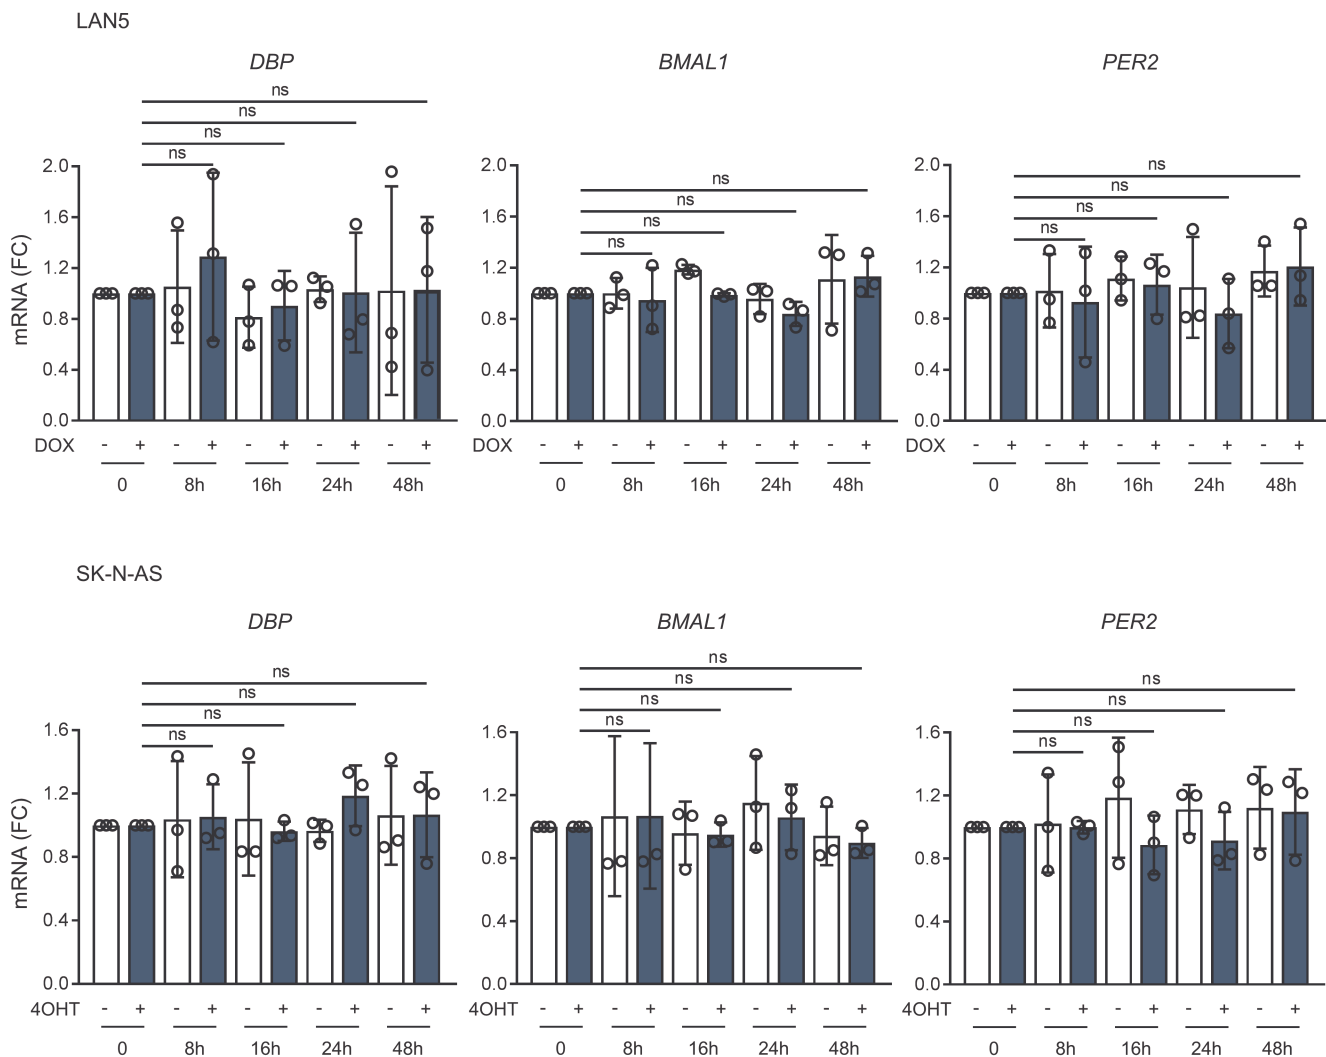

**Supplementary Figure 2. Doxycycline and 4-OHT do not alter clock gene expression.** mRNA expression levels of *DBP*, *BMAL1*, and *PER2* in MNA and non-MNA parental cells (LAN5 and SK-N-AS) upon DOX (2 $\mu$ g/ml) or 4OHT (1 $\mu$ g/ml) treatment (0–48h). Data are mean  $\pm$  SEM (n=3; two-way ANOVA with Sidak's multiple comparisons test; ns=non-significant). FC=Fold Change.

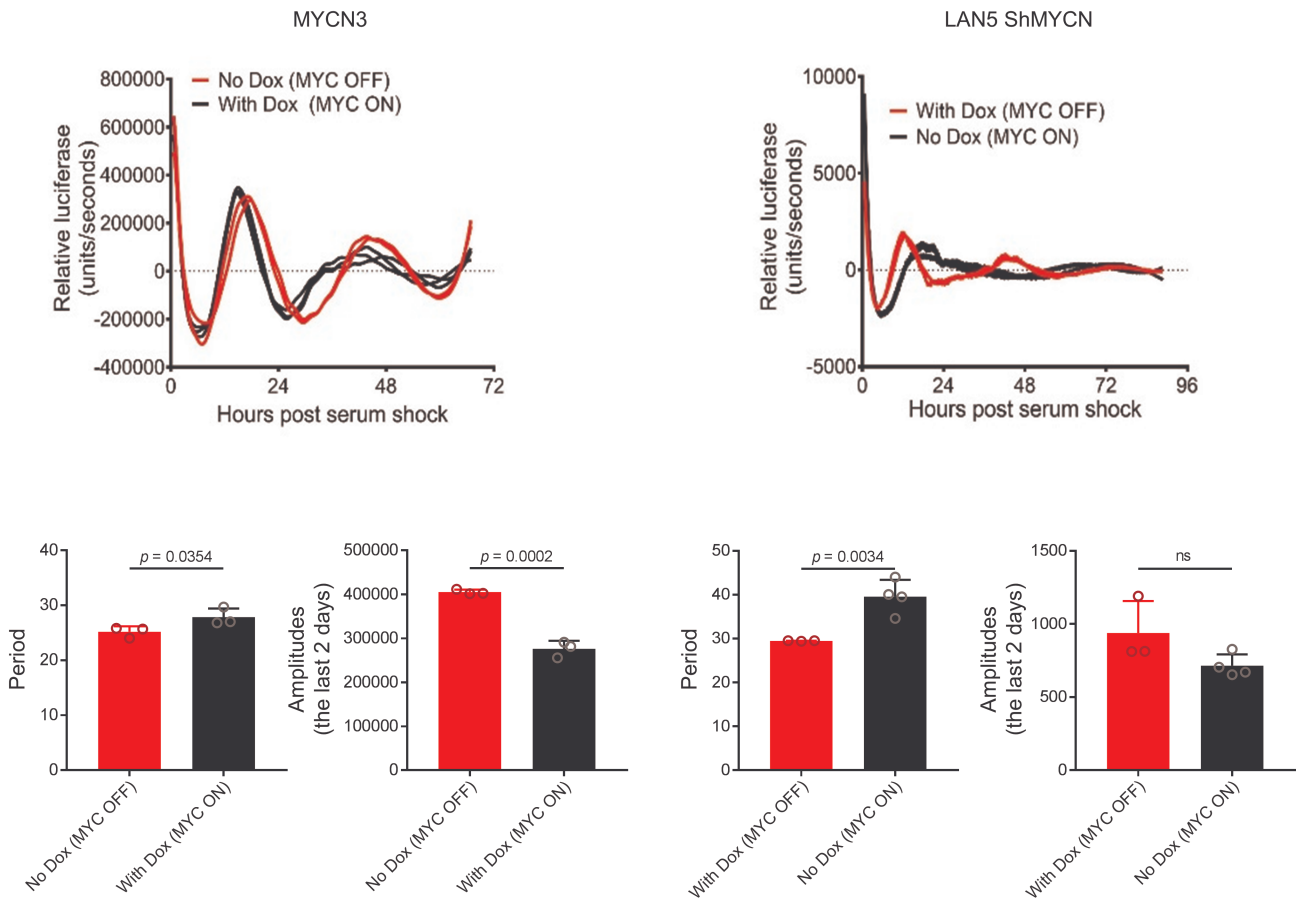

**Supplementary Figure 3. *PER2* oscillation upon changes in MYCN expression.** Real-time luminescence analysis: MYCN3 and LAN5 ShMYCN cells were treated with or without DOX for 48h before infection with *Per2-luc* adenovirus for 24h. Representative *PER2* oscillation and quantification of periods and amplitudes in the presence or absence of DOX are shown. Data are mean  $\pm$  SD ( $n=3-4$  biological replicates; one-tailed t-test; ns=non-significant).

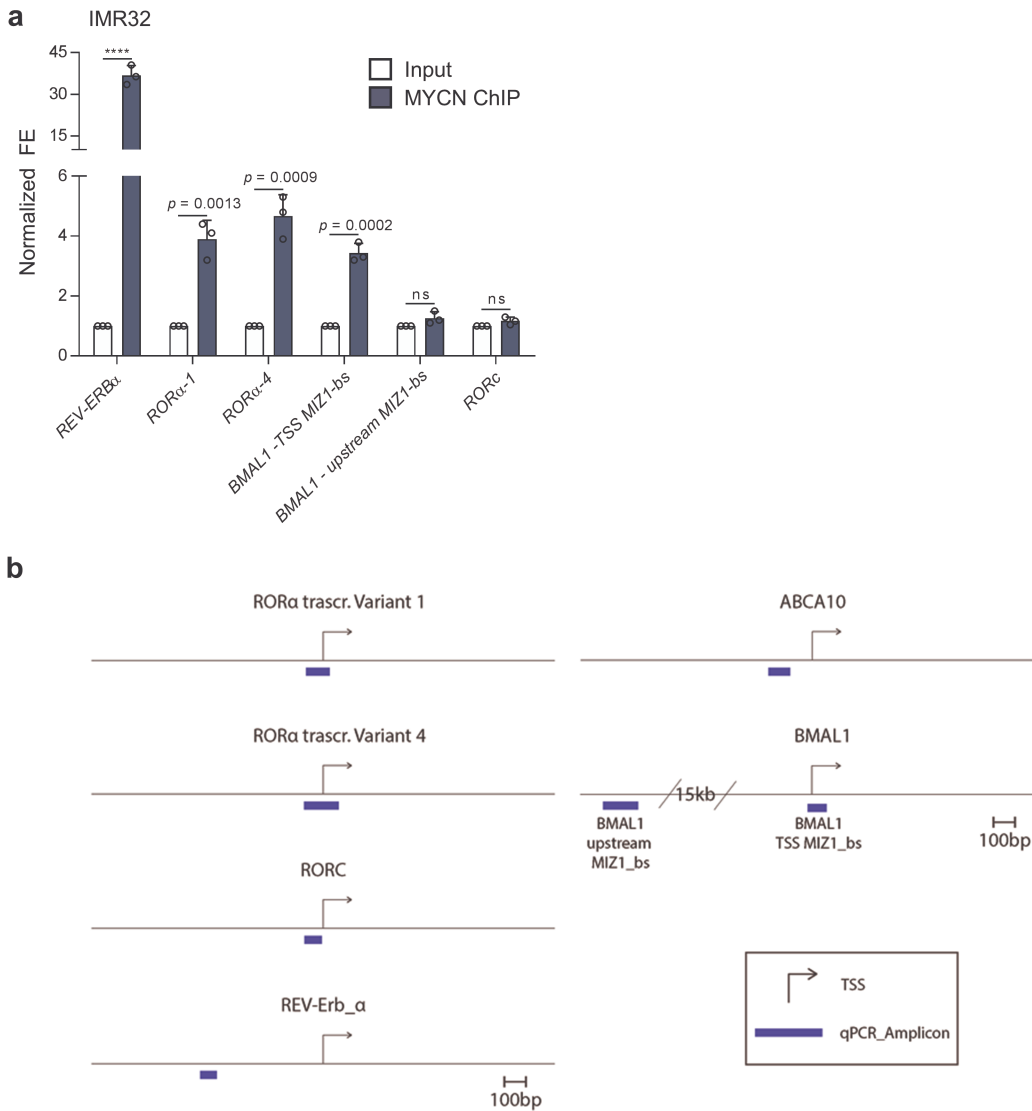

**Supplementary Figure 4. MYCN binds to ROR $\alpha$ , REV-ERB $\alpha$ , and BMAL1 gene promoters. a.** MYCN ChIP-qPCR assays in IMR32 cells. Input (white bars) and MYCN IP (blue bars) samples were analyzed by q-PCR using specific primers for ROR $\alpha$  (variants 1 and 4), REV-ERB $\alpha$ , BMAL1, and RORc (Supplementary Table 3). Data are mean  $\pm$  SD (n=3 independent experiments; \*\*\*\*p<0.0001; two-tailed unpaired t-test). **b.** Graphical representation of the genomic regions analyzed in ChIP-qPCR assays.

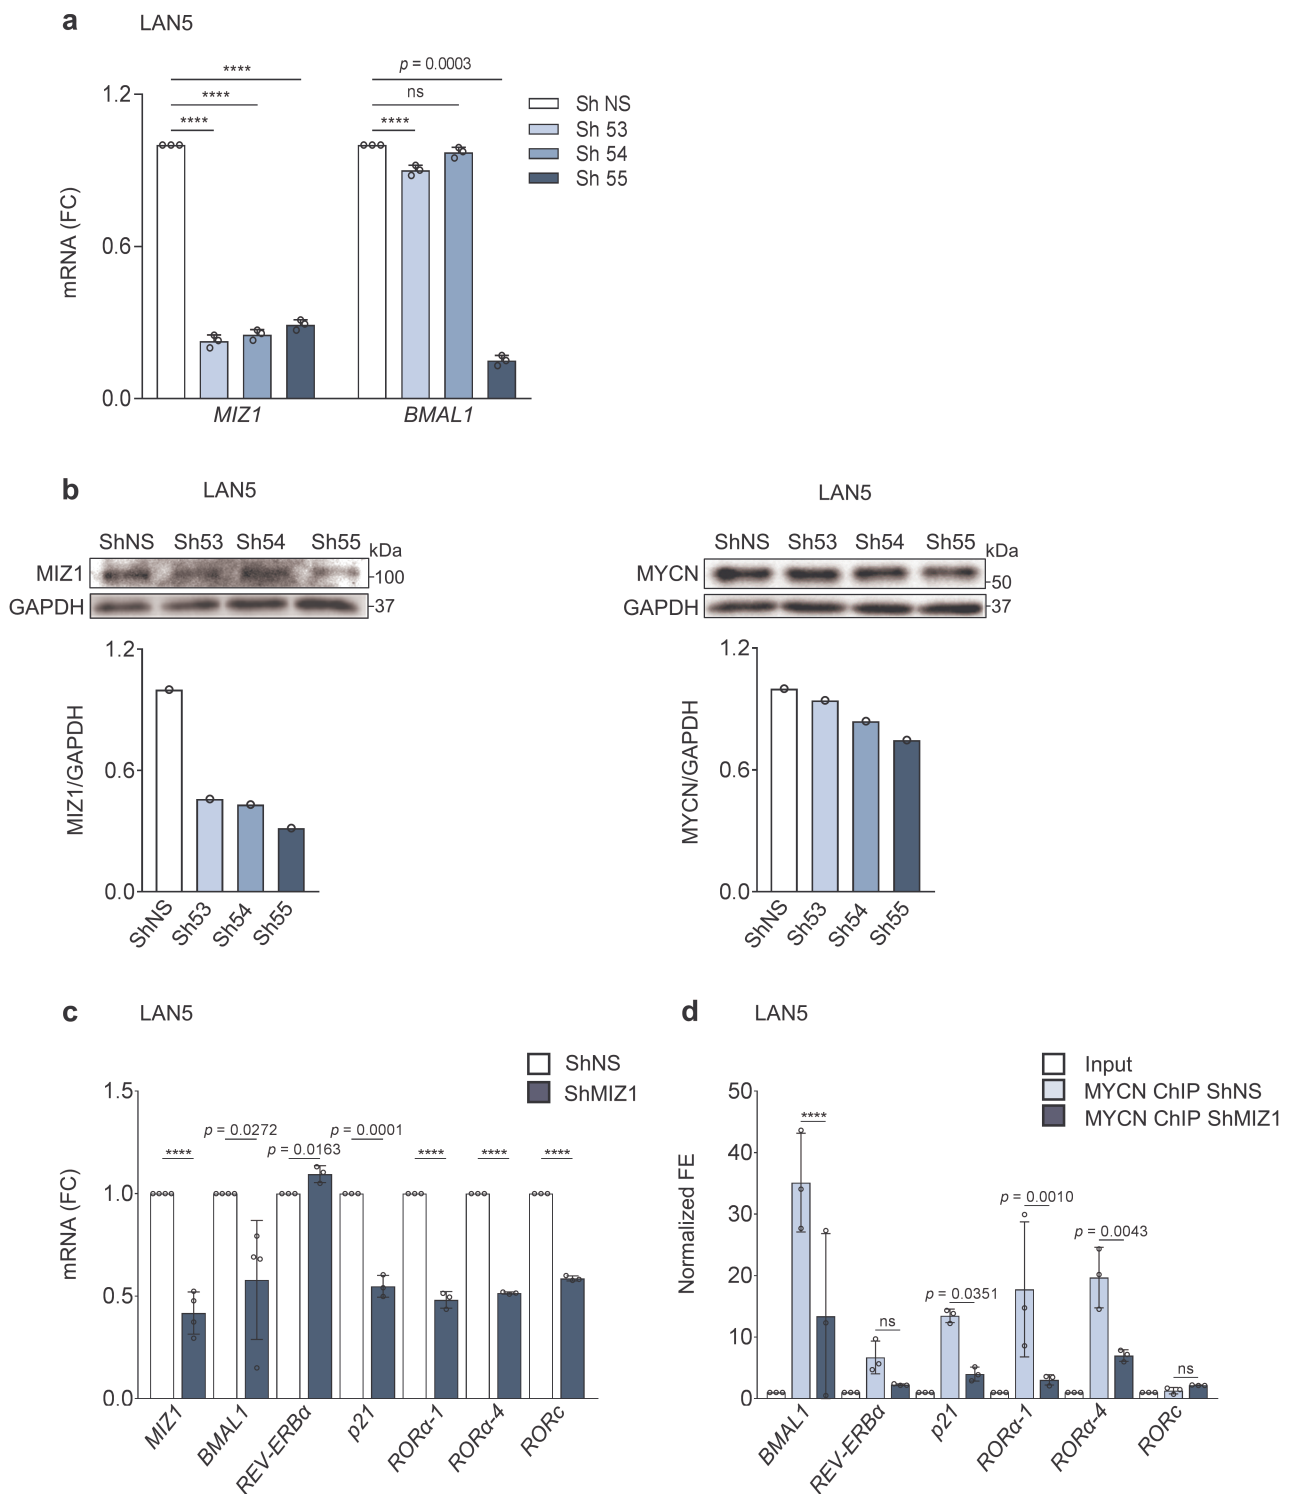

**Supplementary Figure 5. MYCN repression of the clock requires MIZ1.** **a.** *MIZ1* and *BMAL1* mRNA expression in LAN5 cells upon MIZ1 knockdown. Three independent ShMIZ1 sequences (Sh53, 54, and 55) were tested and samples were collected 48h post-transduction. Data are mean  $\pm$  SD and are normalized to *GUSB* expression ( $n=3$ ; \*\*\*\* $p < 0.0001$ ; one-way ANOVA with Dunnett's multiple comparisons test). **b.** MIZ1 and MYCN protein expression upon MIZ1 knockdown (48h). GAPDH was used as loading control and MIZ1, MYCN/GAPDH ratios were determined ( $n=2$ ). Data were analyzed by densitometry (ImageJ v1.42q). **c.** mRNA expression of *MIZ1*, *BMAL1*, *REV-ERB $\alpha$* , *p21*, *ROR $\alpha$ -1*, *ROR $\alpha$ -4* and *RORc* in LAN5 ShCTRL (ShNS) and LAN5 ShMIZ1 (Sh55) cells. Data are mean  $\pm$  SEM and are normalized to *GUSB* expression ( $n=3-4$ ; \*\*\*\* $p < 0.0001$ ; two-tailed unpaired t-test). **d.** MYCN ChIP-qPCR assay in LAN5 ShCTRL (ShNS) and LAN5 ShMIZ1 (Sh55) cells. Input (white bars) and MYCN IP (blue bars). Data are mean  $\pm$  SD ( $n=3$ ; \*\*\*\* $p < 0.0001$ ; two-way ANOVA with Dunnett's multiple comparisons test). FC=Fold Change; FE=Fold Enrichment.

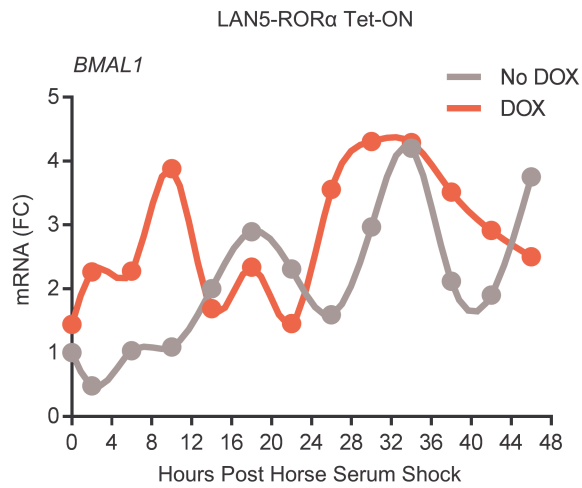

**Supplementary Figure 6. *BMAL1* oscillatory activity in LAN5-ROR $\alpha$  cells.** LAN5-ROR $\alpha$  cells were pre-cultured with (LAN5-ROR $\alpha$  Tet-ON) or without (LAN5-ROR $\alpha$  Tet-OFF) DOX for 48h before synchronization with 50% horse serum for 2h. Cell pellets were collected every 4h for 48h. *BMAL1* mRNA expression was determined by q-PCR and normalized to actin. Data are means from one biological replicate (n=2–4 technical replicates per time point). (FC)=Fold Change.

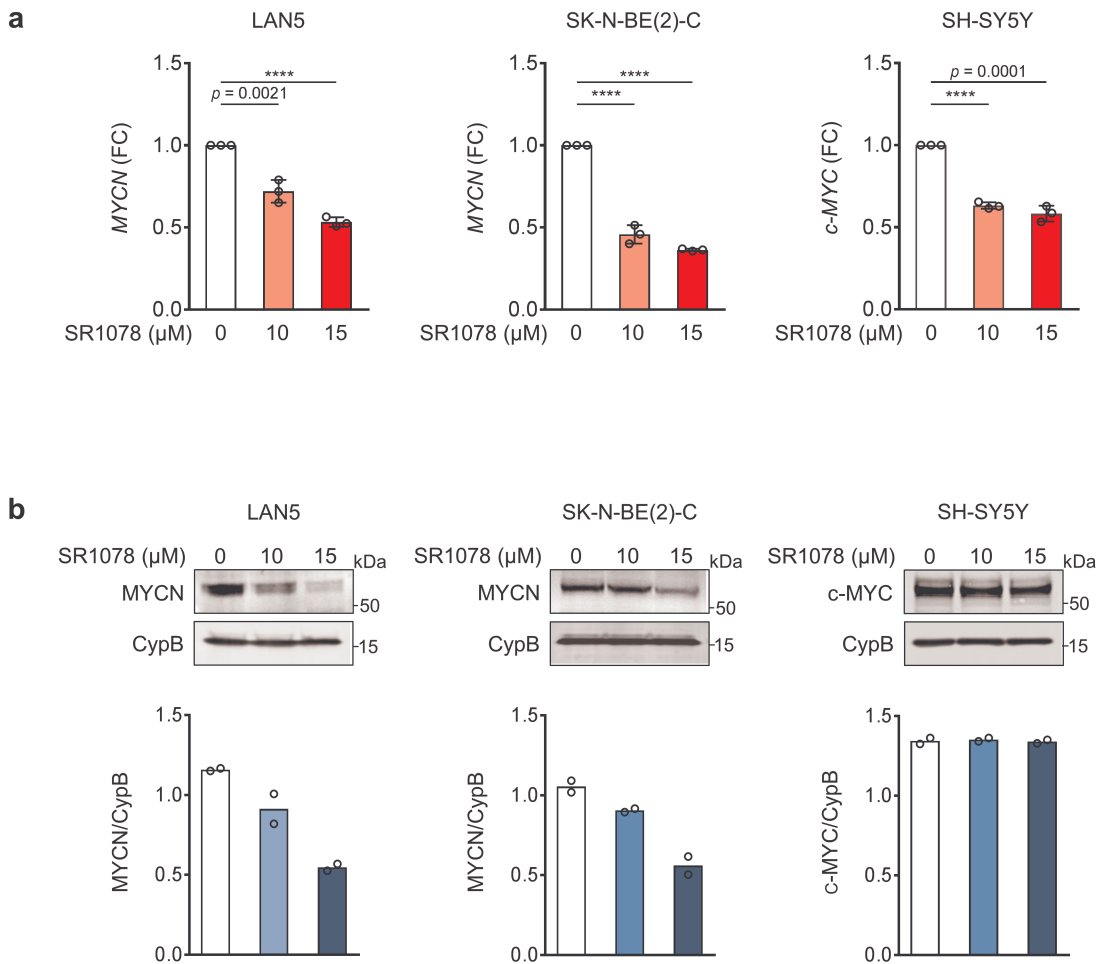

**Supplementary Figure 7. Restoration of molecular clock is MYCN-dependent.** mRNA (a) and protein expression (b) of MYCN and c-MYC in LAN5, SK-N-BE(2)-C (MNA), and SH-SY5Y (non-MNA) cells upon SR1078 treatment. mRNA data are mean  $\pm$  SD ( $n=3$  biological replicates; \*\*\*\* $p<0.0001$ ; two-tailed unpaired t-test). CypB served as protein loading control. Protein expression was analyzed by densitometry (ImageJ v1.42q) and MYCN/c-MYC/CypB ratios were determined ( $n=2$ ). FC=Fold Change.

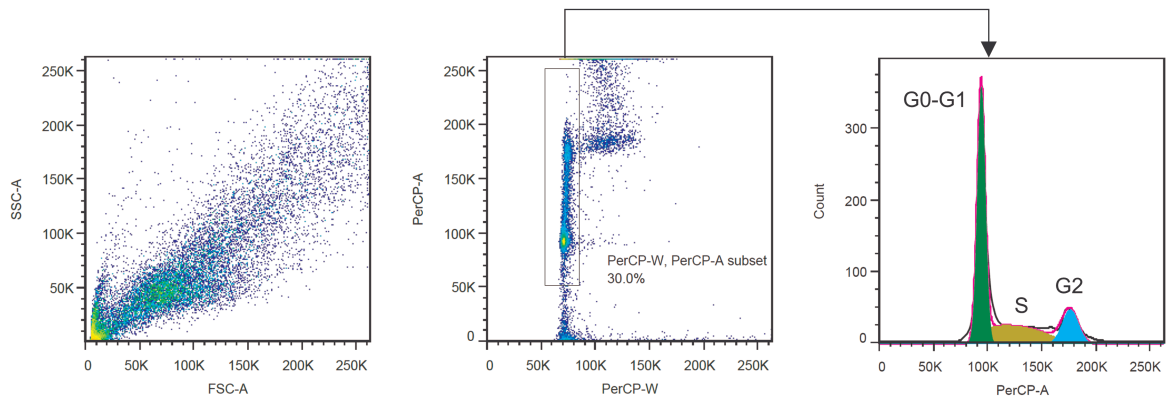

**Supplementary Figure 8. Gating strategy for cell cycle analysis of LAN5 RORα cells.** Cell cycle was analyzed by FlowJo v7.6.1. Single cells were gated on PerCP-W [(50-100)x1000]/PerCP-A[(50-250)x1000]. Histogram was presented as PerCP-A/Count. Percentage of cells in each phase was exported, and stacked bar chart was generated in GraphPad Prism v7.0 (corresponding to Figure 4B).



LAN5

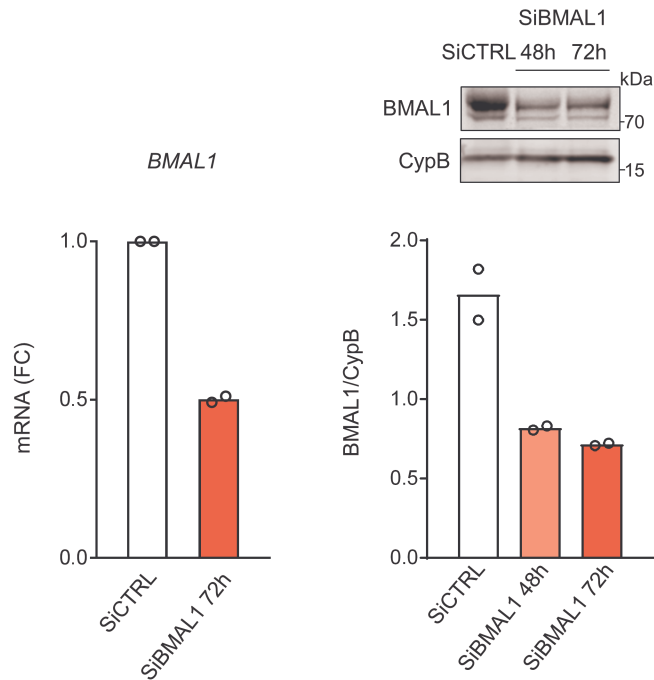

**Supplementary Figure 9. BMAL1 mRNA and protein expression in LAN5 cells upon BMAL1 genetic knockdown.** mRNA data are means (n=2 biological replicates; n=3 technical replicates). CypB served as protein loading control. Protein expression was analyzed by densitometry (ImageJ v1.42q) and BMAL1/CypB ratio was determined (n=2). (FC)=Fold Change.

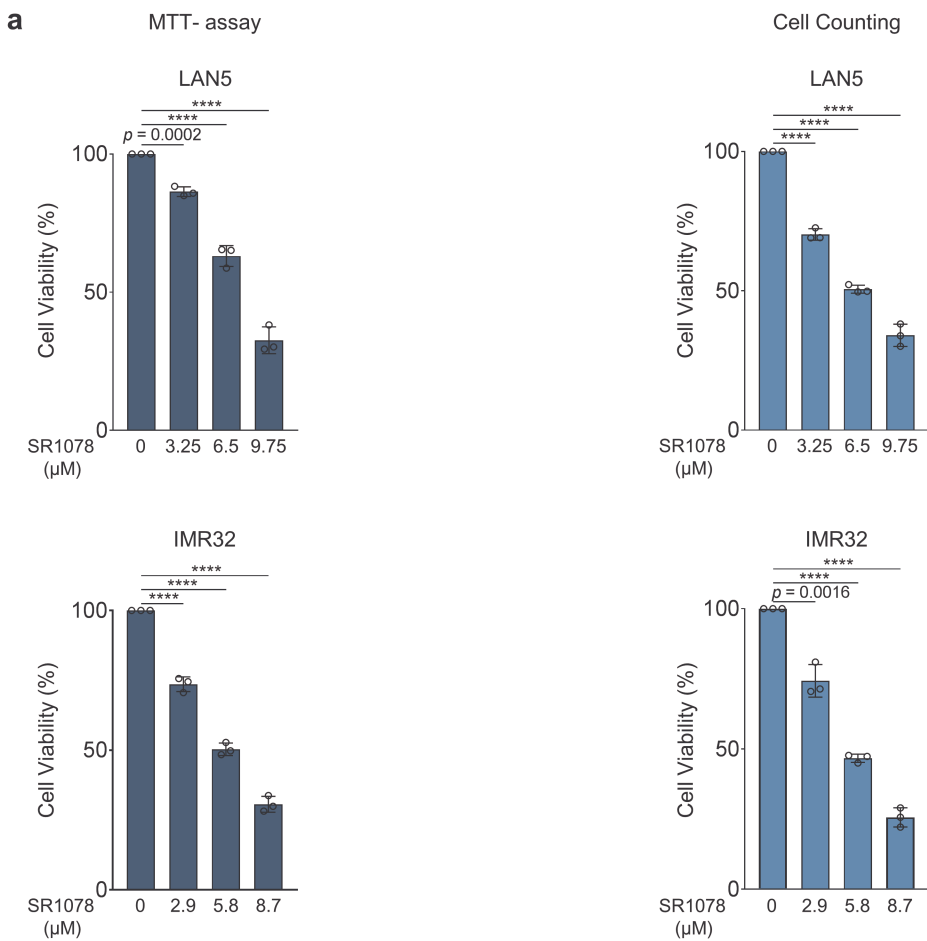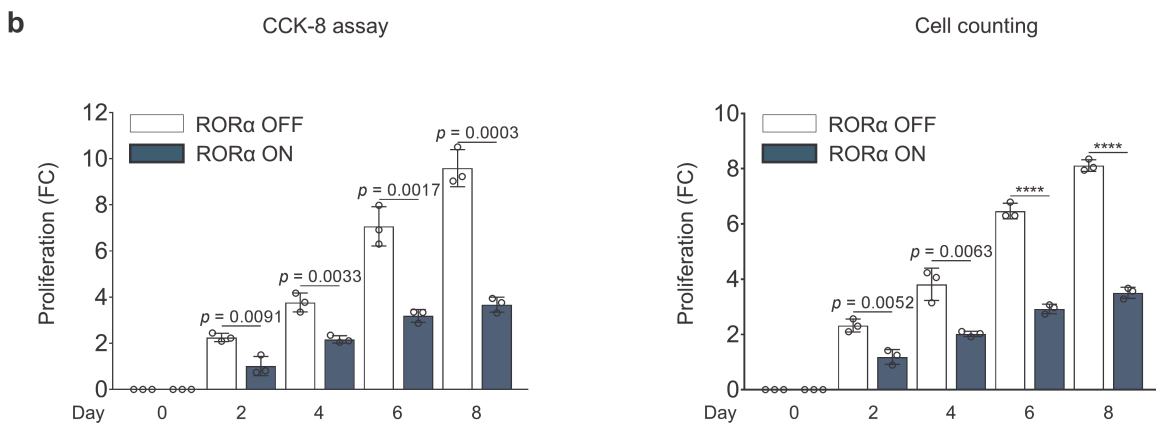

**Supplementary Figure 10. Comparison of different cell proliferation assays.** **a.** Cell viability of MNA LAN5 and IMR2 cells upon SR1078 treatment determined in parallel by MTT assay and cell counting (Neubauer chamber). Data are mean  $\pm$  SD ( $n=3$  biological replicates; \*\*\*\* $p < 0.0001$ , two-tailed unpaired t-test). **b.** Cell proliferation of LAN5-ROR $\alpha$  Tet-ON/OFF cells by CCK-8 assay and cell counting (Neubauer chamber). Data are mean  $\pm$  SD ( $n=3$  biological replicates; \*\*\*\* $p < 0.0001$ , two-tailed unpaired t-test). (FC)=Fold Change.

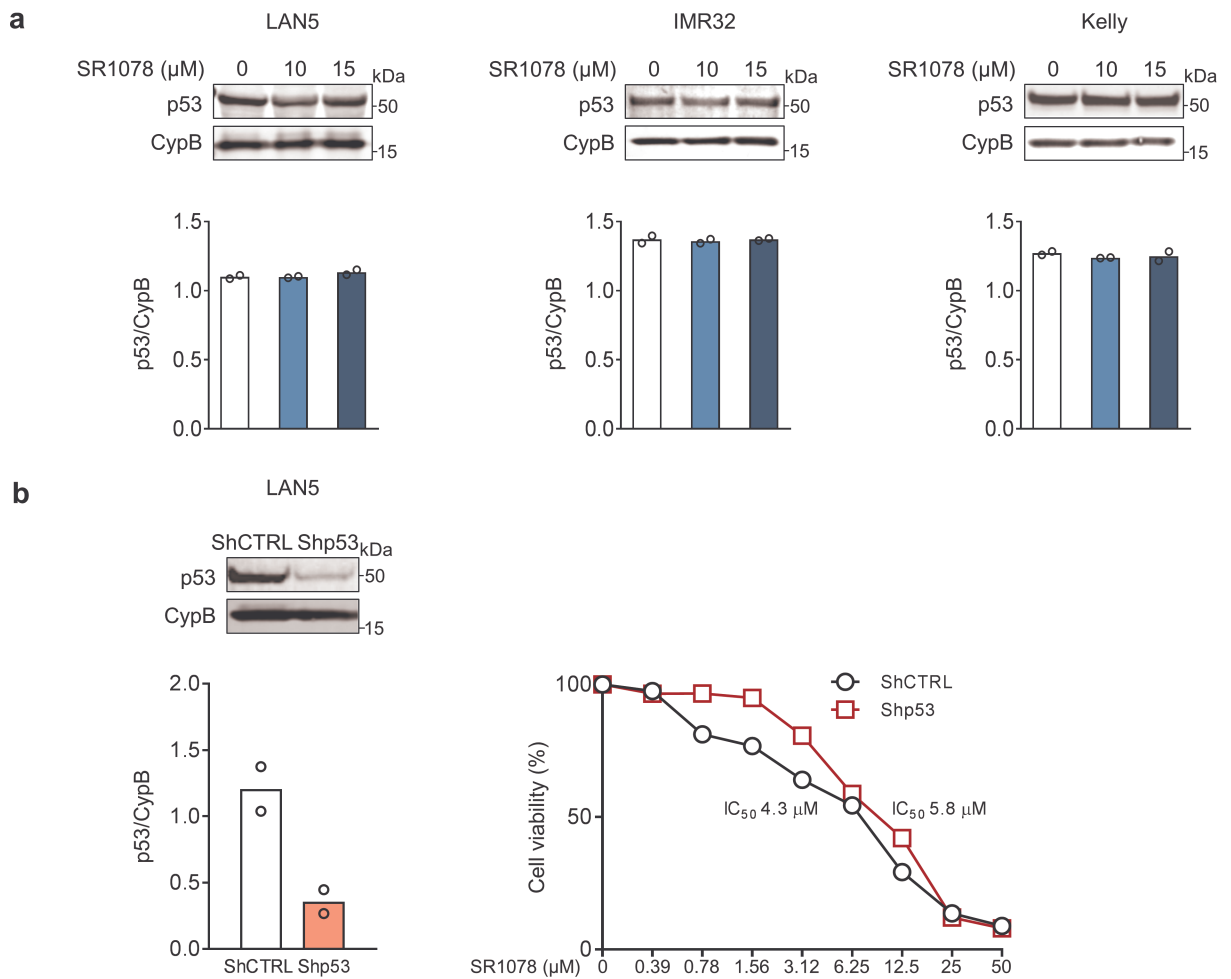

**Supplementary Figure 11. SR1078 functions in a p53-independent manner. a.** p53 protein levels in MNA LAN5, IMR32, and Kelly cells upon SR1078 treatment (24h). CypB served as loading control. Protein expression was analyzed by densitometry (ImageJ v1.42q) and BMAL1/CypB ratio was determined (n=2). **b.** p53 protein expression in LAN5 cells before (ShCTRL) and after (Shp53) genetic depletion of p53 (n=2). Cell viability (MTT assay) of LAN5 ShCTRL and Shp53 cells upon treatment with SR1078 for 72h. Data are means and are representative from n=2 biological replicates (n=4 technical replicates).

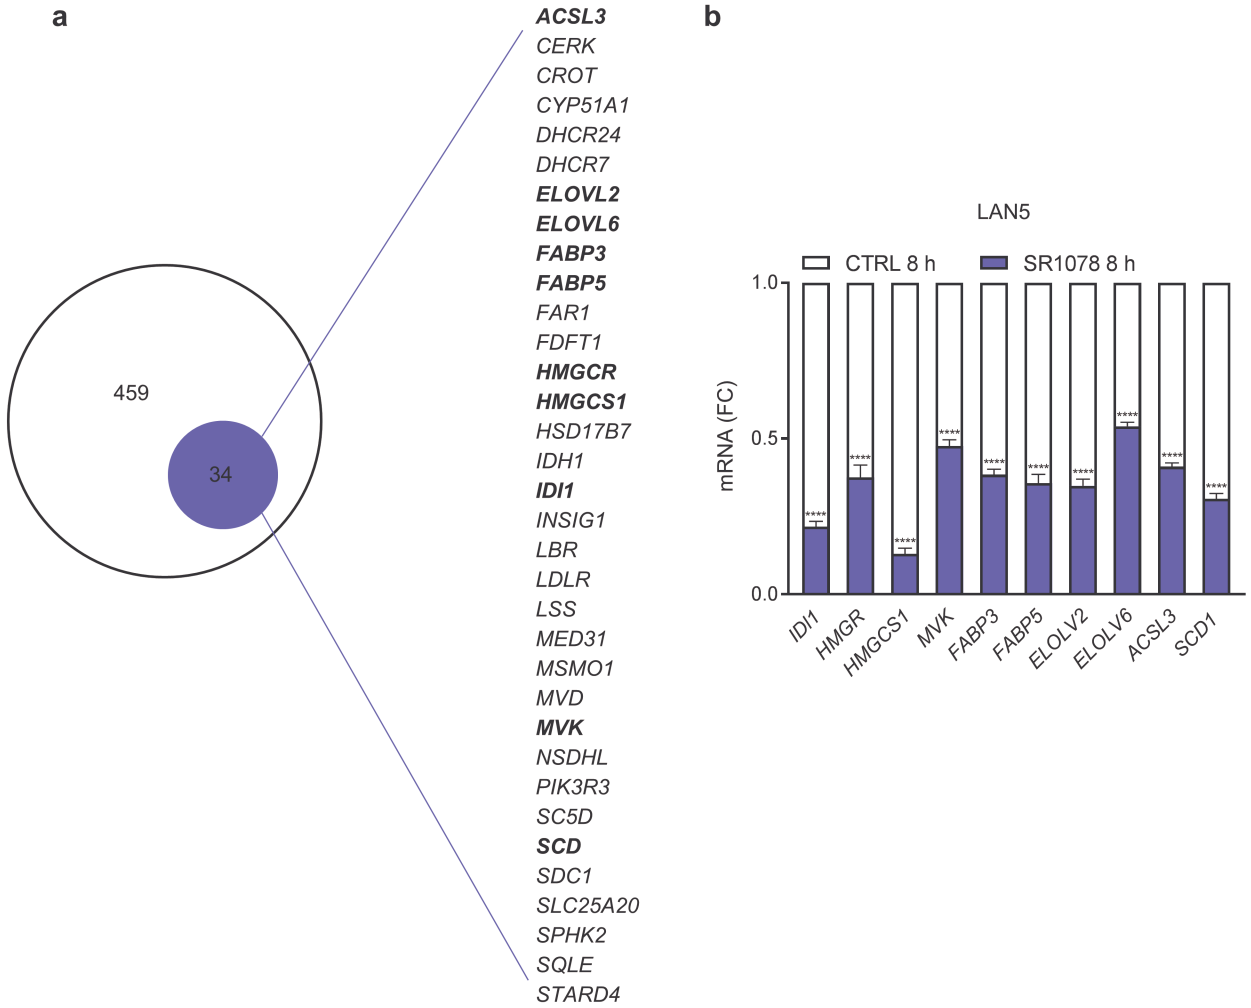

**Supplementary Figure 12. SR1078-downregulated genes in LAN5 cells upon SR1078 treatment.** **a.** Out of the 459 significantly downregulated genes, 34 genes belong to lipid metabolism pathways ( $p < 0.05$ ; two-tailed unpaired t-test; unadjusted p-values). **b.** mRNA expression of lipid metabolic genes (involved both in cholesterol and FA metabolism) in LAN5 cells upon SR1078 treatment ( $10\mu\text{M}$  for 8h). Data are mean  $\pm$  SD ( $n=3$ ; \*\*\*\* $p < 0.0001$ ; two-tailed unpaired t-test). (FC)=Fold Change.

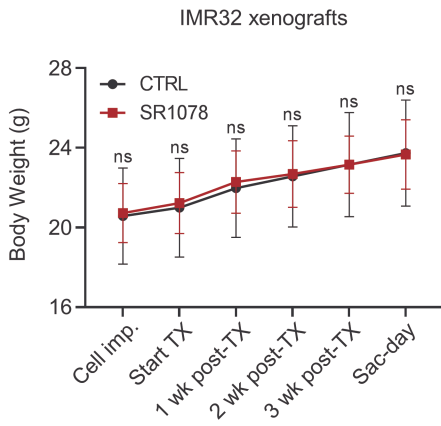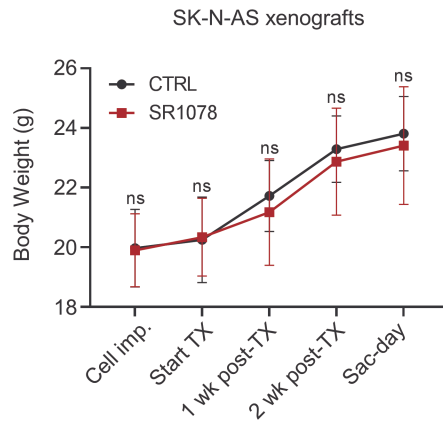

**Supplementary Figure 13. SR1078 treatment does not affect mouse body weights.** Body weights from MNA (IMR32) and non-MNA (SK-N-AS) engrafted mice (CTRL and SR1078 groups) recorded at different times throughout the study. Data are mean  $\pm$  SD; two-way ANOVA with Sidak's multiple comparisons test; ns=non-significant.

**a**

IMR32

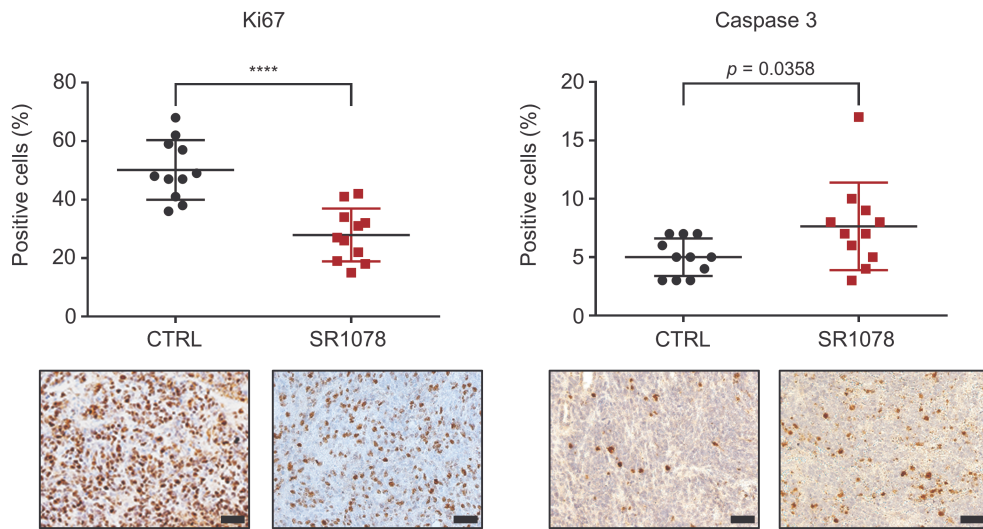**b**LAN5-ROR $\alpha$  Tet-ON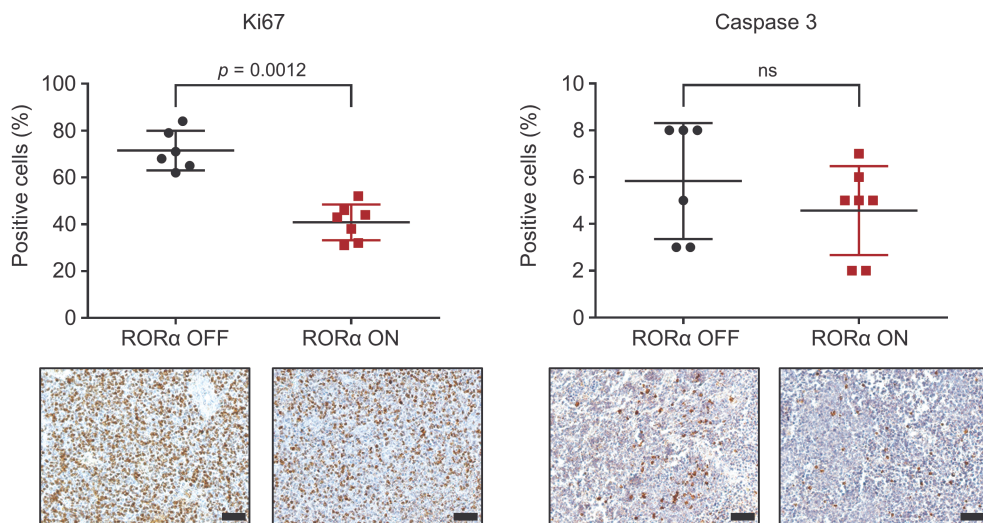

**Supplementary Figure 14. Anti-tumor activity of SR1078.** IHC analysis of tumor cell proliferation (Ki67) and apoptosis (cleaved caspase 3) in MNA xenografts treated with SR1078 (a) or overexpressing ROR $\alpha$  (b). Four fields with 500 cells were evaluated by light microscopy, and percentages of Ki67 and caspase positive tumor cells were calculated. Values are mean  $\pm$  SD (n=4). IMR32 xenografts: control group n=11; SR1078 group n=11 (Ki67: p<0.0001; caspase: p=0.0358 by Mann-Whitney test); LAN5 ROR $\alpha$  xenografts: ROR $\alpha$  OFF group n=6; ROR $\alpha$  ON n=7 (Ki67: p=0.0012; caspase: ns by Mann-Whitney test). Representative images (200x) with nuclear Ki67-positive cells and caspase positive cells are shown. Scale bar=50  $\mu$ M; ns=non-significant.

LAN5 xenografts

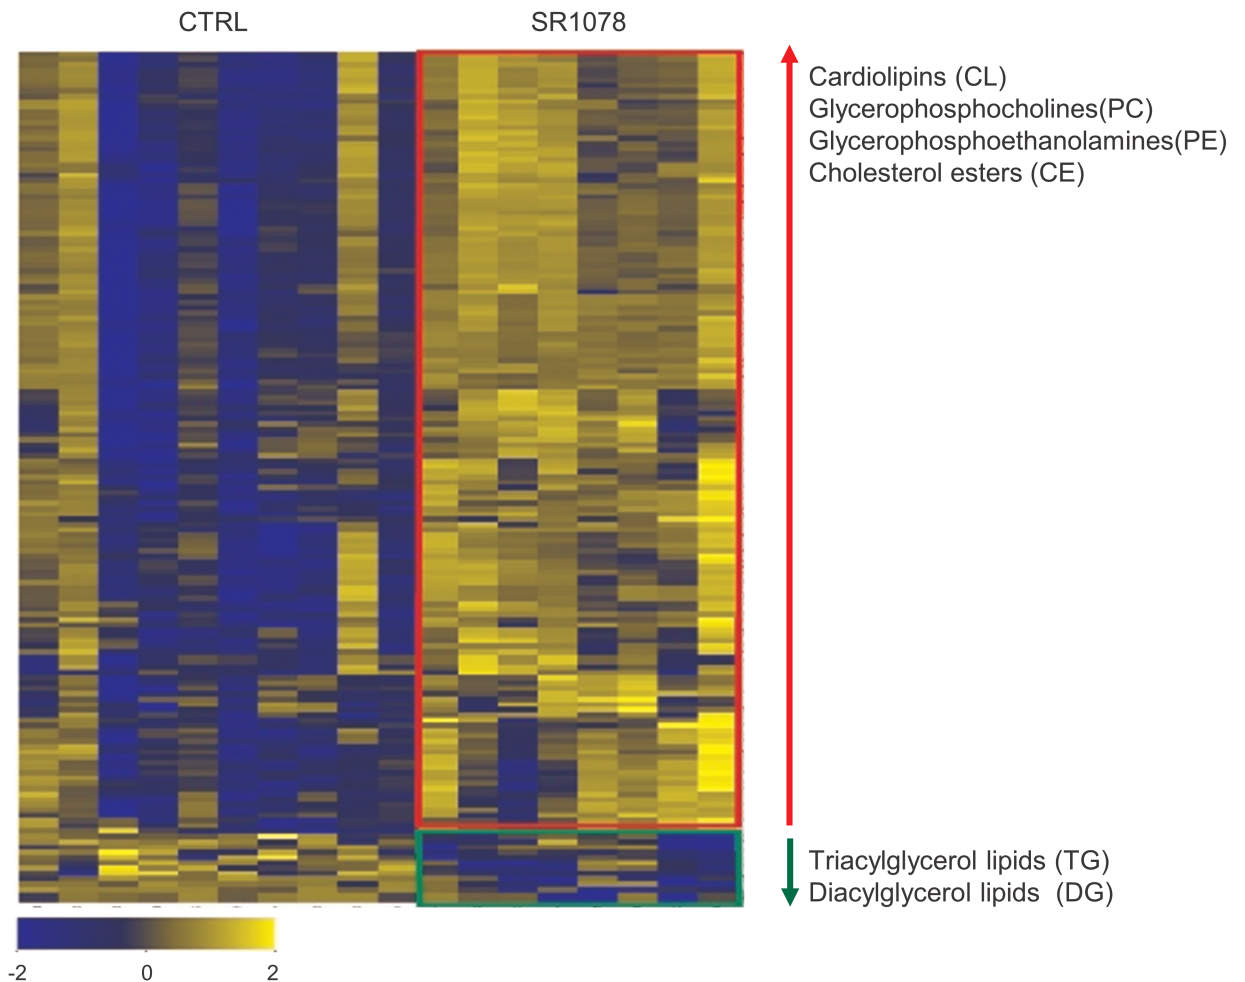

**Supplementary Figure 15. Lipidomics analysis in LAN5 xenografts.** Differentially altered lipids in LAN5-derived xenografts treated with vehicle control or SR1078 (15 mg/kg i.p. for 14 days). Groups were compared by two-tailed unpaired t-test. P-values were adjusted by the Benjamini-Hochberg procedure to obtain FDR. Changes with FDR<0.25 were selected for heat map presentation. Yellow=upregulated lipids; blue=downregulated lipids.

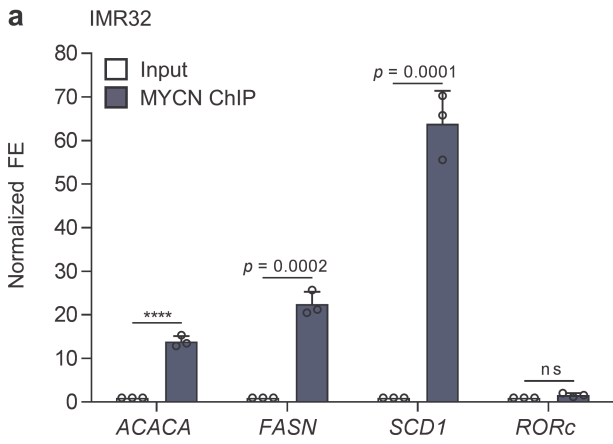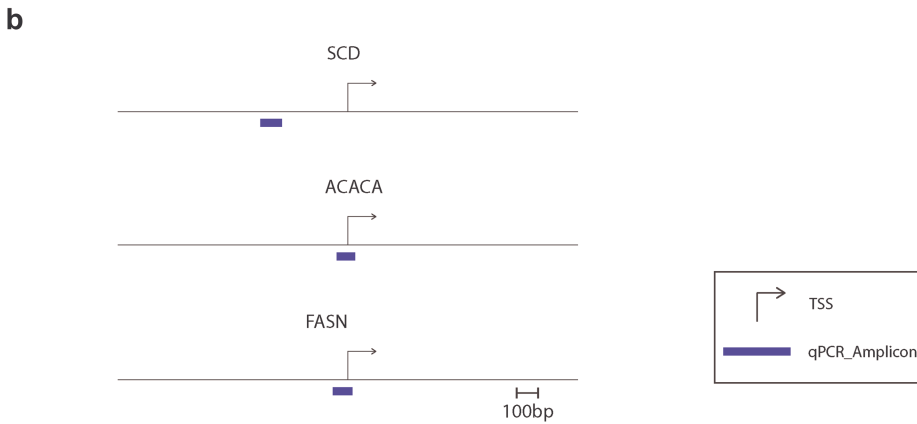

**Supplementary Figure 16. MYCN binds to lipogenic gene promoters.** **a.** MYCN ChIP in IMR32 cells (input=white bars; MYCN IP=blue bars). Samples were analyzed by q-PCR using specific primers for lipogenic enzymes (*ACACA*, *FASN*, *SCD1* and *RORc* as negative control) (Supplementary Table 3). Data are mean  $\pm$  SD (n=3 biological replicates; \*\*\*\* $p < 0.0001$ ; two-tailed unpaired t-test; ns=non-significant). **b.** Graphical representation of the genomic regions analyzed in ChIP-qPCR assays. FC=Fold Change.



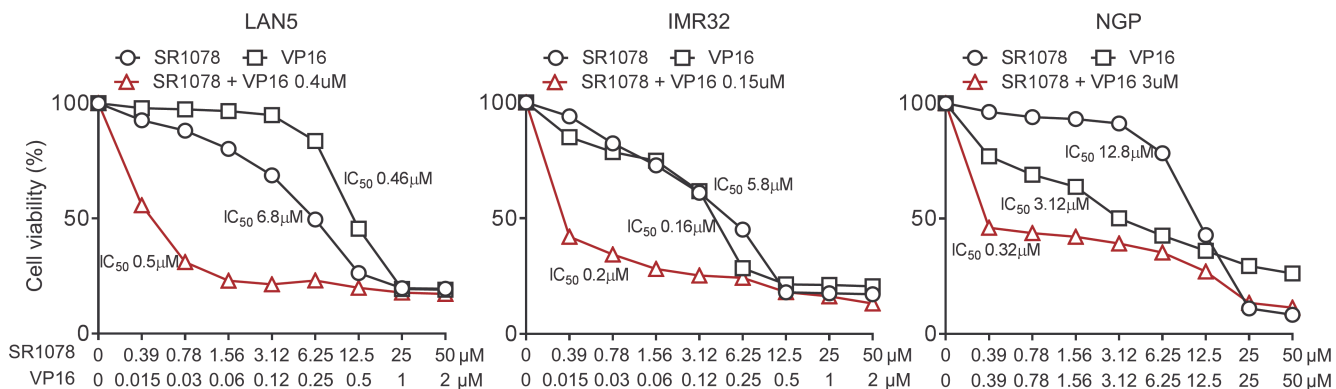

**Supplementary Figure 17. VP16 sensitizes NB cells to SR1078.** Cell viability (MTT assay) of MNA cells (LAN5, IMR32, and NGP) treated with SR1078, VP16, and their combination (IC<sub>50</sub> values of VP16) for 72h. Data are means and are representative from n=2 biological replicates (n=3 technical replicates).

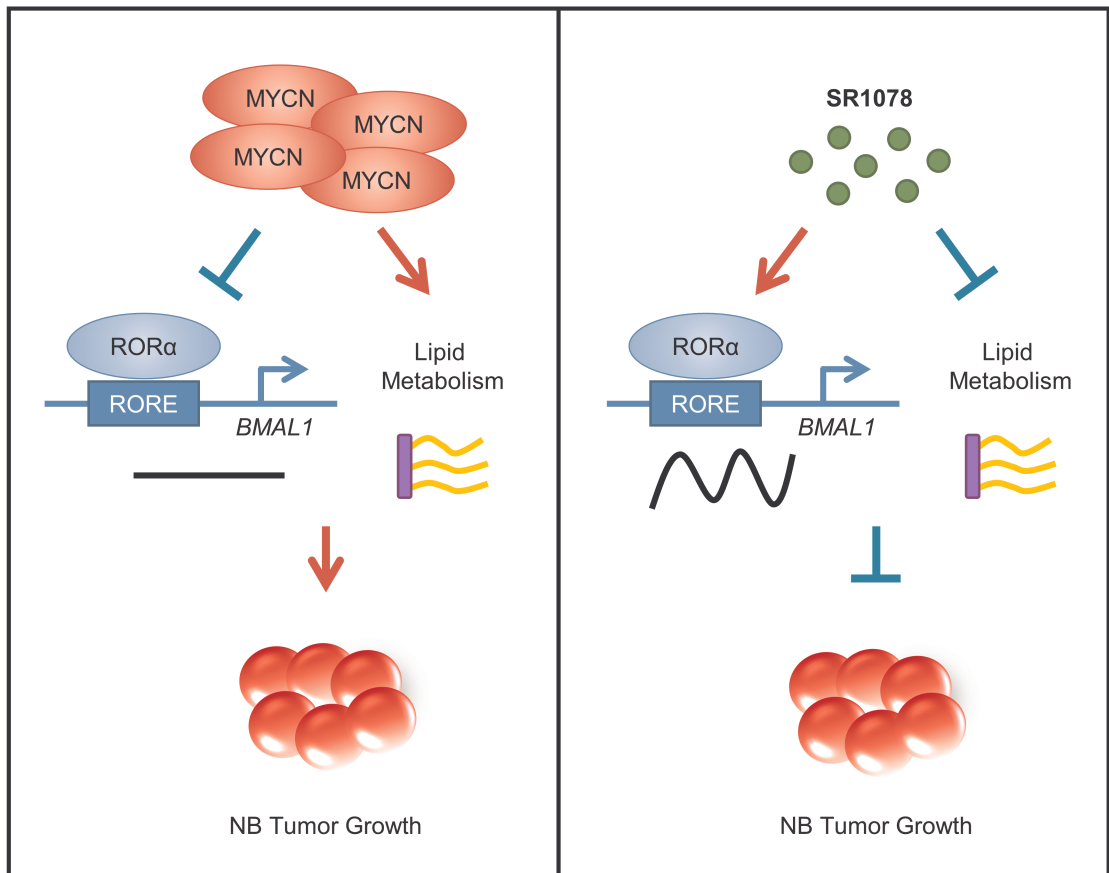

**Supplementary Figure 18. Schematic representation of the regulation of the molecular clock and cell metabolism by MYCN and the ROR agonist SR1078.**

### Supplementary Table 1: *RORα* gene expression independently predicts clinical outcome

Multivariate Cox regression models for 476 NB based on OS and EFS considering prognostic markers and *RORα*

| Markers                           | Overall Survival |              |          |       | Event Free Survival |              |          |       |
|-----------------------------------|------------------|--------------|----------|-------|---------------------|--------------|----------|-------|
|                                   | P-value          | Hazard ratio | 95.0% CI |       | P-value             | Hazard ratio | 95.0% CI |       |
|                                   |                  |              | Lower    | Upper |                     |              | Lower    | Upper |
| <i>RORα</i> (low vs. high)        | 1.00E-03         | .35          | .19      | .67   | 1.40E-02            | .61          | .42      | .91   |
| Age at diagnosis (<18m vs. >=18m) | 4.18E-04         | 3.00         | 1.63     | 5.51  | 8.00E-03            | 1.72         | 1.15     | 2.57  |
| INSS Stage (1, 2, 3, 4s vs. 4)    | 9.00E-06         | 3.28         | 1.94     | 5.53  | 1.00E-05            | 2.31         | 1.59     | 3.33  |
| MYCN (non-Ampl vs. Ampl)          | 2.24E-07         | 3.29         | 2.09     | 5.16  | 3.00E-03            | 1.82         | 1.22     | 2.70  |

Multivariate Cox regression models for 88 NB based on Overall Survival considering prognostic markers and *RORα*

| Markers                           | Overall Survival |              |             |             |
|-----------------------------------|------------------|--------------|-------------|-------------|
|                                   | P-value          | Hazard ratio | 95.0% CI    |             |
|                                   |                  |              | Lower       | Upper       |
| <u>Single</u>                     |                  |              |             |             |
| <i>RORα</i> (low vs. high)        | <b>0.0001</b>    | <b>0.15</b>  | <b>0.06</b> | <b>0.40</b> |
| Age at diagnosis (<18m vs. >=18m) | 0.00005          | 61.64        | 8.34        | 454.76      |
| INSS Stage (1, 2, 4s vs. 3, 4)    | 0.001            | 29.11        | 3.96        | 214.12      |
| MYCN (non-Ampl vs. Ampl)          | 1E-07            | 6.64         | 3.19        | 13.80       |
| <u>Multivariate</u>               |                  |              |             |             |
| <i>RORα</i> (low vs. high)        | <b>0.03</b>      | <b>0.33</b>  | <b>0.12</b> | <b>0.88</b> |
| Age at diagnosis (<18m vs. >=18m) | 0.0002           | 45.40        | 6.06        | 340.12      |
| <i>RORα</i> (low vs. high)        | <b>0.002</b>     | <b>0.22</b>  | <b>0.09</b> | <b>0.59</b> |
| INSS Stage (1, 2, 4s vs. 3, 4)    | 0.003            | 21.84        | 2.94        | 161.85      |
| <i>RORα</i> (low vs. high)        | <b>0.005</b>     | <b>0.23</b>  | <b>0.08</b> | <b>0.64</b> |
| MYCN (non-Ampl vs. Ampl)          | 0.001            | 3.87         | 1.78        | 8.41        |

**Supplementary Table 1. *RORα* gene expression independently predicts clinical outcome.** Multivariate Cox regression models based on OS and EFS of 476 (GEO: GSE45547, cohort 1) and 88 (GEO: GSE16476, cohort 2) patients considering available prognostic markers (age at diagnosis, INSS stage, and MYCN status) and *RORα* gene expression.

**Supplementary Table 2: Analysis of intra-tumoral FAs in LAN5 xenograft tumors upon SR1078 treatment**

| Metabolite                  | CTRL         |              |              |              |              |              |              |              | SR1078       |              |              |              |              |              |              |  |
|-----------------------------|--------------|--------------|--------------|--------------|--------------|--------------|--------------|--------------|--------------|--------------|--------------|--------------|--------------|--------------|--------------|--|
|                             | CTRL         | CTRL         | CTRL         | CTRL         | CTRL         | CTRL         | CTRL         | CTRL         | SR1078       | SR1078       | SR1078       | SR1078       | SR1078       | SR1078       |              |  |
| Aminoheptanoic acid (AHA)   | -4.494292811 | -4.527436431 | -2.080674873 | -3.162980018 | -2.397673899 | -3.785986599 | -4.562554444 | -0.681994615 | -5.80965251  | -3.926508555 | -4.032378673 | -4.378776189 | -4.631142669 | -4.065169408 | -4.390378817 |  |
| Dodecanoic acid (DDA)       | 1.406934296  | 1.607950756  | 2.179172626  | 2.037635426  | 1.999382701  | 1.938543007  | 1.928876418  | 2.34944494   | 1.672563002  | 2.064378692  | 1.76976449   | 1.440315237  | 1.545469442  | 1.948010197  | 1.607100721  |  |
| Tetradecanoic acid (TDA)    | 1.017926788  | -3.642065489 | 1.659367758  | 1.271420866  | 0.973624684  | 0.928655514  | 0.450078879  | 1.557469364  | 0.468213016  | 1.512252316  | 0.275881364  | 0.079046376  | 0.591312034  | 0.496017717  | 0.759382995  |  |
| Palmitoic acid              | 0.461741645  | -0.87082086  | 0.631085506  | 0.602885716  | 0.530095643  | 0.572763564  | 0.366508521  | 0.147321593  | 0.152887692  | 0.581432566  | -0.433677638 | -0.131262529 | -0.169004034 | -0.133294052 | 0.356314009  |  |
| Eicosapentaenoic acid (EPA) | 5.938537439  | 5.914376413  | 5.168167613  | 6.504111793  | 5.435493305  | 6.531327113  | 5.684674756  | 5.091457392  | 5.849600276  | 6.038433087  | 6.755530695  | 6.025503288  | 6.577408195  | 5.931773045  | 6.000040803  |  |
| Eicosatrienoic acid (ETRA)  | 0.33683513   | -1.310959338 | -0.992942444 | 0.225191726  | 0.013806566  | 0.168908158  | -0.679719171 | -0.274834679 | -1.273211678 | -1.625806502 | -1.269026672 | -1.145927256 | -1.22568884  | -1.634015744 | -1.368251754 |  |
| Octadecenoic acid (ODCA)    | -2.488069817 | -1.676846722 | -2.492390981 | -2.788214932 | -2.243593735 | -2.134818878 | -3.027401358 | -3.077016403 | -3.065080969 | -3.663115849 | -3.780705081 | -3.636905132 | -3.399359197 | -3.125206991 | -2.564515212 |  |
| Octadecadienoic acid (ODDA) | 1.541146385  | 1.202730887  | 2.187759913  | 1.770291524  | 1.419936321  | 1.576169831  | 1.793966736  | 2.293185656  | 1.798876186  | 2.459611573  | 1.676997371  | 1.350886226  | 2.300114372  | 1.102451316  | 1.215950782  |  |
| Hexadecanoic acid (HDA)     | 3.500281883  | 3.522816586  | 4.246477599  | 3.946970515  | 4.002386194  | 3.937804382  | 3.696926062  | 4.279180499  | 3.455440439  | 3.947405837  | 3.865761532  | 3.353994288  | 3.833916864  | 3.096957997  | 3.686836604  |  |
| Docosahexaenoic acid (DHA)  | 6.158508261  | 7.157763641  | 5.331252945  | 5.915111431  | 4.578125063  | 7.164930807  | 5.689581911  | 5.510297536  | 6.385033141  | 7.11188304   | 7.823460784  | 7.020581417  | 7.574647627  | 6.337649645  | 6.22265254   |  |
| Eicosatetraenoic acid (ETA) | 7.887036188  | 7.591653007  | 7.291996607  | 7.844186163  | 7.277209622  | 8.186760684  | 7.317346183  | 7.708945503  | 7.499280795  | 7.946336486  | 7.870946504  | 7.620502035  | 7.949027981  | 7.56547663   | 7.728617602  |  |
| Docosapentaenoic acid (DPA) | 4.466357784  | 3.468825105  | 3.024305108  | 4.468644612  | 3.174006835  | 4.784603146  | 3.522093101  | 3.242855064  | 3.821669577  | 4.139424988  | 3.675630046  | 3.470059916  | 3.4127277    | 3.874925282  | 4.381727586  |  |
| Docosatetraenoic acid (DTA) | 4.351376704  | 3.475776614  | 2.6405457    | 4.438151288  | 3.525766439  | 4.586879717  | 3.527903395  | 2.956733679  | 3.163155601  | 3.186284786  | 2.408188374  | 2.763831729  | 0.941387247  | 2.712586197  | 2.911687616  |  |
| Octadecanoic acid (ODA)     | 3.183398548  | 4.582048947  | 4.002105779  | 3.811985881  | 4.166723812  | 4.094524816  | 3.721050849  | 4.279552301  | 3.708971671  | 3.736875094  | 3.250301511  | 3.935638815  | 2.967491497  | 2.910594021  | 3.945568537  |  |

  

| Method                      | Log Fold Change           | Linear Fold Change | P-value_ttest | FDR         |
|-----------------------------|---------------------------|--------------------|---------------|-------------|
|                             | Aminoheptanoic acid (AHA) | -1.250301763       | 0.420360273   | 0.050632916 |
| Dodecanoic acid (DDA)       | -0.209906553              | 0.864593232        | 0.15306131    | 0.238095371 |
| Tetradecanoic acid (TDA)    | 0.070383893               | 1.049996044        | 0.91861138    | 0.924587569 |
| Palmitoic acid              | -0.27328395               | 0.827433945        | 0.24876346    | 0.348268843 |
| Eicosapentaenoic acid (EPA) | 0.384808828               | 1.305686758        | 0.135892448   | 0.237811784 |
| Eicosatrienoic acid (ETRA)  | -1.048918379              | 0.483330392        | 0.000842748   | 0.011798478 |
| Octadecenoic acid (ODCA)    | -0.828225673              | 0.563221506        | 0.003737989   | 0.026165922 |
| Octadecadienoic acid (ODDA) | -0.022450145              | 0.984559196        | 0.924587569   | 0.924587569 |
| Hexadecanoic acid (HDA)     | -0.285846385              | 0.820260246        | 0.09322271    | 0.18644542  |
| Docosahexaenoic acid (DHA)  | 0.986933293               | 1.981967482        | 0.029486144   | 0.103201502 |
| Eicosatetraenoic acid (ETA) | 0.101885117               | 1.073174825        | 0.484256959   | 0.616327039 |
| Docosapentaenoic acid (DPA) | 0.056205098               | 1.039727235        | 0.849167667   | 0.924587569 |
| Docosatetraenoic acid (DTA) | -1.104017185              | 0.465219287        | 0.012849789   | 0.059965681 |
| Octadecanoic acid (ODA)     | -0.486539417              | 0.713735078        | 0.048002672   | 0.11814347  |

**Supplementary Table 2. Analysis of intra-tumoral FAs in LAN5 xenograft tumors upon SR1078 treatment** (CTRL tumors n=8 and SR1078 tumors n=7; FDR< 0.25). Data were normalized by median inter-quartile range normalization and were log<sub>2</sub> transformed. Groups were compared by two-tailed unpaired t-test; p-values were adjusted by the Benjamini-Hochberg procedure to obtain FDR.

**Supplementary Table 3: Primers and SiBMAL1 target sequences**

| q-PCR primers                     |                                    |                                  |
|-----------------------------------|------------------------------------|----------------------------------|
| Primer                            | Forward                            | Reverse                          |
| MYCN                              | 5'CCGGGCATGATCTGCAA                | 5'CCGCCGAAGTAGAAGTCATCTT         |
| c-MYC                             | 5'CGTCTCCACACATCAGCACAA            | 5'CACTGTCCAACCTTGACCTCTTG        |
| REV-ERB $\alpha$                  | 5'CCCCCTTGTACAGAATCGAAC            | 5'GAAGTTCGGTGATGGGGGA            |
| ROR $\alpha$                      | 5'AAACAAGCAGCGGGAGGTGA             | 5'TGGCAAACCTCCACCACATAC          |
| BMAL1                             | 5'GAGAAGGTGGCCCAAAGAGG             | 5'GGAGGCGTACTCGTGATGTT           |
| DKC1                              | 5'GTTGACTACAGTGAGTCTGCCAA          | 5'TCACTCTCTCGCTTCCGCTT           |
| FGF-21                            | 5'ATCGCTCCACTTTGACCCTG             | 5'GGGCTTCGGACTGGTAAACA           |
| G6PASE                            | 5'TGAGGATGGAGGAAGGAA               | 5'GGGGAAGAGGACGTAGAA             |
| FASN                              | 5'ACAGGGACAACCTGGAGTTC             | 5'CTGTGGTCCCACCTTGATGAGT         |
| SCD1                              | 5'TTCAGAAACACATGCTGATCCTCATAATTCCC | 5'ATTAAGCACCACAGCATATCGCAAGAAAGT |
| ACACA                             | 5'CCGCTTGCCTGACTTTTGAT             | 5'GCCTCAATTTCCCTTGCTGC           |
| ODC1                              | 5'CTTCGTGCAGGCAATCTCT              | 5'TCTCTCAAATTTAAGTTTCACATCCT     |
| IDI1                              | 5'AATAAACTAACCACCTCG               | 5'CTCGATGCAATAATCCTTTCTC         |
| HMGR                              | 5'ACTTCGTGCATGACTTTC               | 5'GACATAATCATCTTGACCCTC          |
| HMGCS1                            | 5'TTGGCTTCATGATCTTTAC              | 5'AATTTAACATCCCCAAAGGC           |
| MVK                               | 5'GAACCTTGAGAACATTCTCC             | 5'GATACCAATGTTGGGTAAAGC          |
| FABP3                             | 5'CTTCAAGAACACAGAGATCAG            | 5'GAGTGTCCAGGATGAGTTTTTC         |
| FABP5                             | 5'5'AAGATGGGAAATTAGTGGTG           | 5'AACAGTATGGAGATTTGCTC           |
| ELOLV2                            | AAGTTTCTTTGGACCAACAC               | 5'ACTTGTGCATAGATGGAAC            |
| ELOLV6                            | 5'GGCAAATGAGGAAAACAAC              | 5'CCTTGTGCCATTTCTTTTG            |
| ACSL3                             | 5'AACTCATAGCAAACCATTG              | 5'TCCTAGTTCTGGAATCCTTTC          |
| PER2                              | 5'GGGTGCGCTCGTTTGAAC               | 5'GGAACGAAGCTTTCGGACCTC          |
| DBP                               | 5'CGTGGAGGTGTTGATGACCTT            | 5'CGATGTCTTCGAGGGTCAAAG          |
| 18S                               | 5'AAGTCCCTGCCCTTTGTACACA           | 5'GATCCGAGGGCCTCACTAAAC          |
| GAPDH                             | 5'TCACCACCATGGAGAAGGC              | 5'GCTAAGCAGTTGGTGGTGC            |
| ChIP-qPCR primers:                |                                    |                                  |
| ROR $\alpha$ trascr. Variant 4 FW | TGATGTCAGCCGGTCACATG               |                                  |
| ROR $\alpha$ trascr. Variant 4 RV | CAGGGAGAGCGGATGGTC                 |                                  |
| ROR $\alpha$ trascr. Variant 1 FW | CTGCTTTTTCCCTCCTGCTTTC             |                                  |
| ROR $\alpha$ trascr. Variant 1 RV | GTTTTTCAGAGCAACTCTATGGTACC         |                                  |
| RORc FW                           | TCCACTGGTCTCTCCTCATGTC             |                                  |
| RORc RV                           | TCCAGCAGGCAGGAAAAG                 |                                  |
| REV-ERB $\alpha$ FW               | TGTTCTCCCTAAGGCGAGTAGAAG           |                                  |
| REV-ERB $\alpha$ RV               | TTCAGGGCAAAGTCCAGAGAAG             |                                  |
| BMAL1 TSS MIZ1-bs FW              | GGATTGGTCCGAAAGTAGGTT              |                                  |
| BMAL1 TSS MIZ1-bs RV              | CGGGTAAACAGGCACCTC                 |                                  |
| BMAL1 upstream MIZ1_bs FW         | TCCTGACTGCCACAGATCAA               |                                  |
| BMAL1 upstream MIZ1_bs RV         | TCCCTCCTGTTCCAAGTGAG               |                                  |
| ABCA10 FW                         | AGCAACATCACCAACCTTATATTTCCC        |                                  |
| ABCA10 RV                         | TTAGTCAGTAAACTCACTCAGTAAAGC        |                                  |
| SCD1 FW                           | CAGCCACCCAGGATCTG                  |                                  |
| SCD1 RV                           | CATTGTTCCGAGGCGTACC                |                                  |
| FASN FW                           | TTGTCCGCACCACACCAG                 |                                  |
| FASN RV                           | CAGGCCGCTGGAGCTC                   |                                  |
| ACACA FW                          | GCCACCGCCCTCTTGG                   |                                  |
| ACACA RV                          | CCCATCCTCCAGTCTC                   |                                  |

SiBMAL1 target sequences:

1. CCAUUGAACAUACAGAGUA
2. CCACAUAGGUUAGACAUG
3. GCACAUCGUGUUAUGAAUA
4. CGCGAUAGAUGAAAGUUU

**Supplementary Table 3. List of primer sequences and SiBMAL1 target sequences.**
