# Supplementary material for: Restoration of the molecular clock is tumor suppressive in neuroblastoma
Source: PubMed Central journal article supplement (PMC8238982; doi:10.1038/s41467-021-24196-4), 2021-06-28
Supplement: 41467_2021_24196_MOESM3_ESM.pdf [file 41467_2021_24196_MOESM3_ESM.pdf]

## Description of Additional Supplementary Files

File Name: Supplementary Data 1

Description: **RNA-seq analysis in LAN5 cells upon SR1078 treatment** (8h, n=3 per group). Significantly up and downregulated genes are shown ( $p < 0.05$ ; two-tailed unpaired t-test; unadjusted p-values).

File Name: Supplementary Data 2

Description: **Lipidomics analysis in LAN5 xenograft tumors upon SR1078 treatment**. Control group tumors: n=10; SR1078 group tumors: n=8. Groups were compared by two-tailed unpaired t-test; p-values were adjusted by the Benjamini-Hochberg procedure to obtain FDR values.
